# Supplementary material
Source: Elsevier journal article supplement (https://www.sciencedirect.com/science/article/pii/S0025775319301290)
Supplement: mmc1 [file S0025775319301290:mmc1.pdf]

## MATERIAL SUPLEMENTARIO

**Tabla S1. Criterios de inclusión y exclusión de los pacientes del estudio PALIARAGON**

### **Criterios de inclusión**

Deben cumplirse todos los criterios siguientes:

1. Edad  $\geq 18$  años.
2. Ingreso en un Servicio de Medicina Interna.
3. Consentimiento informado escrito.
4. Cumplir criterios de paciente pluripatológico.
5. Presentar una o más de las siguientes insuficiencias crónicas no reversibles de órgano, independientemente de la causa primigenia que las originó, en estadio evolucionado:
  - a. Insuficiencia cardíaca con disnea basal clase III o IV de la NYHA.
  - b. Insuficiencia respiratoria crónica con disnea basal mayor o igual a 3 de la escala MRC y/o saturación basal de oxígeno  $<90\%$  y/o tratamiento con oxígeno domiciliario.
  - c. Insuficiencia renal crónica en estadio 4 ó 5 de la National Kidney Foundation (tasa de filtrado glomerular  $<30$  mL/min, o bien creatininemias basales  $\geq 3$  mg/dL).
  - d. Hepatopatía crónica con datos clínicos, analíticos, endoscópicos o ecográficos de hipertensión portal y/o insuficiencia hepatocelular (puntuación en la escala de Child-Pugh  $> 7$ ).
  - e. Enfermedad neurológica crónica con deterioro cognitivo establecido (SPMSQ  $\geq 7$  errores) y/o deterioro funcional para las actividades básicas de la vida diaria establecido (índice de Barthel  $< 60$  puntos).

### **Criterios de exclusión**

Presencia de uno de los siguientes criterios:

1. Presencia de neoplasia activa excepto adenocarcinoma de próstata localizado en tratamiento hormonal y carcinoma basocelular-espinocelular cutáneo.
2. Inclusión en lista activa de trasplante cardíaco, hepático y/o renal.
3. Previsión de entrada en programa crónico de depuración extrarrenal.
4. Fallecimiento durante el ingreso.

MRC: Medical Research Council; NYHA: New York Heart Association;  
SPMSQ: Short portable mental status questionnaire

|                                                                                                                                                                                                                            |
|----------------------------------------------------------------------------------------------------------------------------------------------------------------------------------------------------------------------------|
| <b>Tabla S2. Criterios de paciente pluripatológico utilizados en el estudio PALIARAGON</b>                                                                                                                                 |
| <b>CATEGORÍA A</b>                                                                                                                                                                                                         |
| A.1. Insuficiencia cardíaca que en situación de estabilidad clínica haya estado en grado II de la NYHA <sup>1</sup> (síntomas con actividad física habitual).                                                              |
| A.2. Cardiopatía isquémica (angina o infarto).                                                                                                                                                                             |
| <b>CATEGORÍA B</b>                                                                                                                                                                                                         |
| B.1. Vasculitis y enfermedades autoinmunes sistémicas.                                                                                                                                                                     |
| B.2. Enfermedad renal crónica definida por elevación de creatinina (> 1,4 mg/dL en varones, > 1,3 mg/dL en mujeres) o proteinuria <sup>2</sup> , mantenidos durante 3 meses.                                               |
| <b>CATEGORÍA C</b>                                                                                                                                                                                                         |
| C.1. Enfermedad respiratoria crónica que en situación de estabilidad clínica haya estado con disnea grado 2 de la MRC <sup>3</sup> (disnea a paso habitual en llano), ó FEV <sub>1</sub> < 65%, ó SatO <sub>2</sub> ≤ 90%. |
| <b>CATEGORÍA D</b>                                                                                                                                                                                                         |
| D.1. Enfermedad inflamatoria crónica intestinal.                                                                                                                                                                           |
| D.2. Hepatopatía crónica con datos de insuficiencia hepatocelular <sup>4</sup> ó hipertensión portal <sup>5</sup> .                                                                                                        |
| <b>CATEGORÍA E</b>                                                                                                                                                                                                         |
| E.1. Ataque cerebrovascular.                                                                                                                                                                                               |
| E.2. Enfermedad neurológica con déficit motor permanente que provoque una limitación para las actividades básicas de la vida diaria (índice de Barthel < 60).                                                              |
| E.3. Enfermedad neurológica con deterioro cognitivo permanente, al menos moderado (Pfeiffer ≥ 5 errores).                                                                                                                  |
| <b>CATEGORÍA F:</b>                                                                                                                                                                                                        |
| F.1. Arteriopatía periférica sintomática.                                                                                                                                                                                  |
| F.2. Diabetes mellitus con retinopatía proliferativa ó neuropatía sintomática.                                                                                                                                             |
| <b>CATEGORÍA G:</b>                                                                                                                                                                                                        |
| G.1. Anemia crónica por pérdidas digestivas o hemopatía adquirida no subsidiaria de tratamiento curativo que presente Hb < 10 g/dL en dos determinaciones separadas entre sí más de tres meses.                            |
| G.2. Neoplasia sólida ó hematológica activa no subsidiaria de tratamiento con intención curativa.                                                                                                                          |
| <b>CATEGORÍA H:</b>                                                                                                                                                                                                        |
| H.1. Enfermedad osteoarticular crónica que provoque por sí misma una limitación para las actividades básicas de la vida diaria (índice de Barthel < 60).                                                                   |
| Se considera PP si tiene un criterio de al menos dos categorías diferentes.                                                                                                                                                |
| <sup>1</sup> Ligera limitación de la actividad física. La actividad física habitual le produce disnea, angina, cansancio o palpitaciones.                                                                                  |
| <sup>2</sup> Índice albúmina/creatinina > 300 mg/g, microalbuminuria > 3mg/dL en muestra de orina ó Albúmina>300 mg/dia en orina de 24 horas ó >200 microg/min                                                             |
| <sup>3</sup> Incapacidad de mantener el paso de otra persona de la misma edad, caminando en llano, debido a la dificultad respiratoria o tener que parar a descansar al andar en llano al propio paso.                     |
| <sup>4</sup> INR >1,7, albúmina <3,5 g/dL, bilirrubina >2 mg/dL.                                                                                                                                                           |
| <sup>5</sup> Definida por la presencia de datos clínicos, analíticos, ecográficos o endoscópicos.                                                                                                                          |
